# Supplementary material for: Building of multifluorescent mesoporous silica nanoparticles
Source: Royal Society of Chemistry journal article supplement (doi:10.1039/b900200f), 2009-01-01
Supplement: b900200f.pdf [file b900200f.pdf]

## Supporting Information

### Building of multifluorescent mesoporous silica nanoparticles

Lingzhi Wang, Juying Lei and Jinlong Zhang\*

Lab for Advanced Materials and Institute of Fine Chemicals, East China University of Science and Technology, 130 Meilong Road, Shanghai, 200237, P. R. China

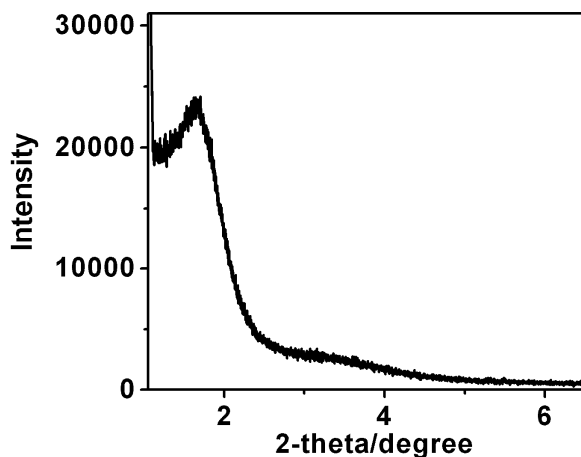

Fig 1. Low-angle XRD pattern of calcined MSPs

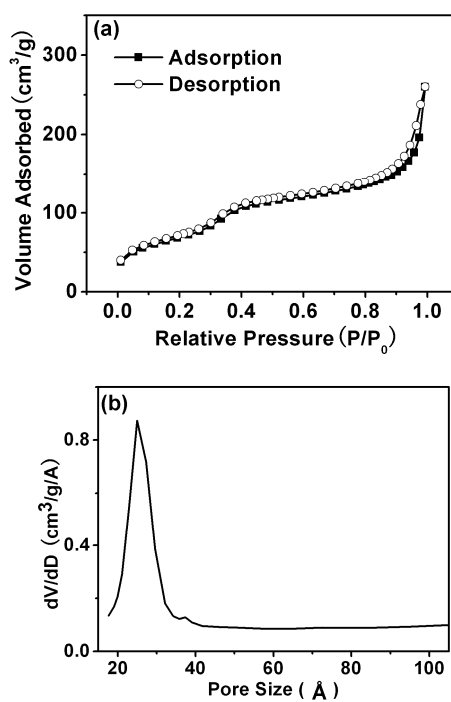

Fig. 2 Nitrogen adsorption/desorption isotherms (a) and pore size distributions (b) of the calcined MSPs.

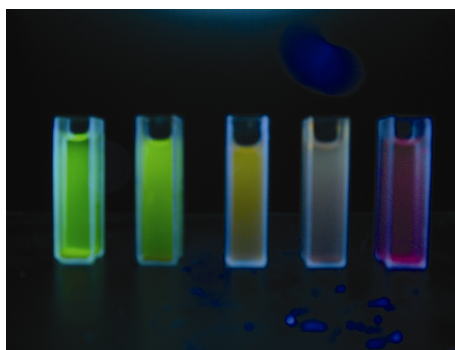

**Fig. 3** Flurescent mesoporous nanoparticle samples with different doping dye combinations under 365 nm UV illumination. Dye doping ratios between FITC and RBITC (in order): 1:0, 2:1, 1:1, 1:2, 0:1.
